# Supplementary material for: Changes in the Proteome of Medicago sativa Leaves in Response to Long-Term Cadmium Exposure Using a Cell-Wall Targeted Approach
Source: MDPI journal article supplement (doi:10.3390/ijms19092498), 2018-08-24
Supplement: s1 [file s1]

**Table S2.** Identified proteins in all three cell wall protein-enriched fractions (CaCl<sub>2</sub>, EGTA, LiCl). The given spot numbers correspond to those detected on gel, which changed significantly in response to Cd exposure. The table only contains those spots in which a single protein was identified and were, therefore, considered for biological interpretation. The given gi- numbers correspond to NCBI protein database. Statistics were automatically done by the SameSpots software. The predicted subcellular localization was determined by TargetP online tool (<http://www.cbs.dtu.dk/services/TargetP/>). S: secretory pathway; C: chloroplast; M: mitochondrion; /: any other location. Information about the biological function were obtained with the Blast2Go software and literature. FC: Fold change; <sup>a</sup>: as a result of the prediction by DeepLoc, <sup>b</sup>: Type of protein, soluble or membrane, respectively indicated with Sol and Memb

| # spot                                                         | Identification | Assigned protein                                                               | p-value  | FC  | Functional class       | TargetP | Localisation <sup>a</sup> | Type <sup>a,b</sup> |
|----------------------------------------------------------------|----------------|--------------------------------------------------------------------------------|----------|-----|------------------------|---------|---------------------------|---------------------|
| <b><u>CaCl<sub>2</sub> fraction</u></b>                        |                |                                                                                |          |     |                        |         |                           |                     |
| <b><i>Proteins of lower abundance in Cd-exposed plants</i></b> |                |                                                                                |          |     |                        |         |                           |                     |
| 2175                                                           | gi 357504821   | pectinesterase/pectinesterase inhibitor ( <i>Medicago truncatula</i> )         | 2.50E–02 | 1.8 | cell wall modification | S       | Lysosome/Vacuole          | Sol                 |
| 1771                                                           | gi 922335979   | polygalacturonase non-catalytic protein ( <i>Medicago truncatula</i> )         | 1.80E–02 | 1.9 | cell wall modification | S       | Extracellular             | Sol                 |
| 3105                                                           | gi 357446161   | CAP, cysteine-rich secretory protein, antigen 5 ( <i>Medicago truncatula</i> ) | 1.70E–02 | 1.9 | defence                | S       | Lysosome/Vacuole          | Sol                 |
| 239                                                            | gi 357513969   | auxin-binding protein ABP19a ( <i>Medicago truncatula</i> )                    | 1.30E–02 | 1.3 | nutrient reserve       | S       | Extracellular             | Sol                 |
| 2689                                                           | gi 357513969   | auxin-binding protein ABP19a ( <i>Medicago truncatula</i> )                    | 6.00E–03 | 1.3 | nutrient reserve       | S       | Extracellular             | Sol                 |
| 2690                                                           | gi 357513969   | auxin-binding protein ABP19a ( <i>Medicago truncatula</i> )                    | 1.00E–03 | 1.5 | nutrient reserve       | S       | Extracellular             | Sol                 |
| 2692                                                           | gi 357513969   | auxin-binding protein ABP19a ( <i>Medicago truncatula</i> )                    | 2.77E–04 | 1.4 | nutrient reserve       | S       | Extracellular             | Sol                 |
| 2783                                                           | gi 922390231   | auxin-binding protein ABP19a ( <i>Medicago truncatula</i> )                    | 3.30E–02 | 1.6 | nutrient reserve       | S       | Extracellular             | Sol                 |
| 2790                                                           | gi 922390231   | auxin-binding protein ABP19a ( <i>Medicago truncatula</i> )                    | 3.00E–03 | 1.3 | nutrient reserve       | S       | Extracellular             | Sol                 |
| 2786                                                           | gi 11133884    | Oxygen-evolving enhancer protein 2                                             | 5.00E–03 | 1.7 | photosynthesis         | C       | Plastid                   | Memb                |
| 2863                                                           | gi 922378759   | oxygen-evolving enhancer protein 2-1 ( <i>Medicago truncatula</i> )            | 1.20E–02 | 1.8 | photosynthesis         | C       | Plastid                   | Memb                |

|                                                          |              |                                                                                |          |     |                                |   |                  |      |
|----------------------------------------------------------|--------------|--------------------------------------------------------------------------------|----------|-----|--------------------------------|---|------------------|------|
| 3645                                                     | gi 922378761 | oxygen-evolving enhancer protein 2-1 ( <i>Medicago truncatula</i> )            | 4.70E-02 | 1.7 | photosynthesis                 | C | Plastid          | Memb |
| 3213                                                     | gi 3914601   | Ribulose biphosphate carboxylase small chain,                                  | 1.00E-02 | 2.2 | photosynthesis                 | C | Plastid          | Memb |
| 3214                                                     | gi 3914601   | Ribulose biphosphate carboxylase small chain,                                  | 5.79E-04 | 1.7 | photosynthesis                 | C | Plastid          | Memb |
| 3219                                                     | gi 3914601   | Ribulose biphosphate carboxylase small chain,                                  | 2.00E-02 | 1.5 | photosynthesis                 | C | Plastid          | Memb |
| 3231                                                     | gi 3914601   | Ribulose biphosphate carboxylase small chain,                                  | 2.10E-02 | 2.2 | photosynthesis                 | C | Plastid          | Memb |
| 3211                                                     | gi 3914601   | ribulose-1,5-bisphosphate carboxylase small subunit ( <i>Medicago sativa</i> ) | 2.40E-02 | 1.7 | photosynthesis                 | C | Plastid          | Memb |
| 3561                                                     | gi 3914601   | ribulose-1,5-bisphosphate carboxylase small subunit ( <i>Medicago sativa</i> ) | 1.00E-03 | 1.7 | photosynthesis                 | C | Plastid          | Memb |
| 2395                                                     | gi 922336891 | photosystem II oxygen-evolving enhancer protein ( <i>Medicago truncatula</i> ) | 4.00E-02 | 3.6 | photosynthesis                 | C | Plastid          | Memb |
| 3558                                                     | gi 922395263 | plant/F18G18-200 protein ( <i>Medicago truncatula</i> )                        | 4.00E-02 | 1.3 | unknown function               | S | Extracellular    | Sol  |
| 3611                                                     | gi 922395263 | plant/F18G18-200 protein ( <i>Medicago truncatula</i> )                        | 6.00E-03 | 1.8 | unknown function               | S | Extracellular    | Sol  |
| 3672                                                     | gi 922395263 | plant/F18G18-200 protein ( <i>Medicago truncatula</i> )                        | 2.00E-03 | 1.6 | unknown function               | S | Extracellular    | Sol  |
| <b>Proteins of higher abundance in Cd-exposed plants</b> |              |                                                                                |          |     |                                |   |                  |      |
| 3620                                                     | gi 87240471  | Glycoside hydrolase, family 17 ( <i>Medicago truncatula</i> )                  | 4.00E-03 | 1.8 | carbohydrate metabolic process | / | Lysosome/Vacuole | Sol  |
| 2280                                                     | gi 357474069 | glucan endo-1,3-beta-glucosidase ( <i>Medicago truncatula</i> )                | 6.66E-04 | 3.2 | carbohydrate metabolic process | S | Extracellular    | Sol  |
| 2420                                                     | gi 357454031 | glycoside hydrolase family 18 protein ( <i>Medicago truncatula</i> )           | 1.80E-02 | 1.9 | carbohydrate metabolic process | S | Lysosome/Vacuole | Sol  |
| 3547                                                     | gi 922383650 | glycoside hydrolase family 18 protein ( <i>Medicago truncatula</i> )           | 7.04E-04 | 2.4 | carbohydrate metabolic process | S | Lysosome/Vacuole | Sol  |

|      |              |                                                                                     |          |     |                             |   |                  |     |
|------|--------------|-------------------------------------------------------------------------------------|----------|-----|-----------------------------|---|------------------|-----|
| 3124 | gi 357449105 | disease-resistance response protein<br>( <i>Medicago truncatula</i> )               | 1.58E-04 | 3.9 | defence                     | / | Cytoplasm        | Sol |
| 2402 | gi 821595433 | stromal 70 kDa heat shock-related protein, chloroplastic ( <i>Cucumis sativus</i> ) | 3.00E-02 | 1.6 | defence                     | C | Plastid          | Sol |
| 2236 | gi 922401927 | allergen Pru protein, putative<br>( <i>Medicago truncatula</i> )                    | 1.00E-03 | 3.3 | defence                     | S | Extracellular    | Sol |
| 2915 | gi 922347233 | Chitinase / Hevein / PR-4 / Wheatwin2<br>( <i>Medicago truncatula</i> )             | 2.00E-03 | 1.8 | Defence                     | S | Extracellular    | Sol |
| 3218 | gi 922403681 | Chitinase / Hevein / PR-4 / Wheatwin2<br>( <i>Medicago truncatula</i> )             | 5.00E-03 | 3   | Defence                     | S | Extracellular    | Sol |
| 2508 | gi 357443753 | chitinase ( <i>Medicago truncatula</i> )                                            | 5.00E-03 | 3.9 | Defence                     | S | Extracellular    | Sol |
| 2525 | gi 228204925 | chitinase class III-1 ( <i>Medicago sativa</i> )                                    | 3.20E-02 | 1.4 | Defence                     | S | Extracellular    | Sol |
| 3489 | gi 548592    | Pathogenesis-related protein 1;                                                     | 6.51E-05 | 2.4 | defence                     | S | Lysosome/Vacuole | Sol |
| 3028 | gi 357446161 | CAP, cysteine-rich secretory protein, antigen 5 ( <i>Medicago truncatula</i> )      | 3.61E-04 | 3.1 | defence                     | S | Lysosome/Vacuole | Sol |
| 3030 | XP003593358  | CAP, cysteine-rich secretory protein, antigen 5 ( <i>Medicago truncatula</i> )      | 5.75E-05 | 3.1 | defence                     | S | Lysosome/Vacuole | Sol |
| 3031 | gi 357446161 | CAP, cysteine-rich secretory protein, antigen 5 ( <i>Medicago truncatula</i> )      | 2.96E-04 | 2.6 | defence                     | S | Lysosome/Vacuole | Sol |
| 3034 | gi 357446351 | CAP, cysteine-rich secretory protein, antigen 5 ( <i>Medicago truncatula</i> )      | 1.50E-02 | 1.4 | defence                     | S | Lysosome/Vacuole | Sol |
| 3037 | gi 357446161 | CAP, cysteine-rich secretory protein, antigen 5 ( <i>Medicago truncatula</i> )      | 2.20E-02 | 1.7 | defence                     | S | Lysosome/Vacuole | Sol |
| 3081 | gi 357446161 | CAP, cysteine-rich secretory protein, antigen 5 ( <i>Medicago truncatula</i> )      | 4.70E-04 | 2   | defence                     | S | Lysosome/Vacuole | Sol |
| 3095 | gi 357446161 | CAP, cysteine-rich secretory protein, antigen 5 ( <i>Medicago truncatula</i> )      | 4.60E-02 | 1.4 | defence                     | S | Lysosome/Vacuole | Sol |
| 2339 | gi 357476371 | class III peroxidase ( <i>Medicago truncatula</i> )                                 | 2.39E-04 | 2   | oxidation-reduction process | S | Extracellular    | Sol |

|      |              |                                                                         |          |     |                             |   |               |     |
|------|--------------|-------------------------------------------------------------------------|----------|-----|-----------------------------|---|---------------|-----|
| 2349 | gi 357476371 | class III peroxidase ( <i>Medicago truncatula</i> )                     | 3.00E-03 | 1.9 | oxidation-reduction process | S | Extracellular | Sol |
| 2357 | gi 357476371 | class III peroxidase ( <i>Medicago truncatula</i> )                     | 3.21E-04 | 2   | oxidation-reduction process | S | Extracellular | Sol |
| 2359 | gi 357476371 | class III peroxidase ( <i>Medicago truncatula</i> )                     | 6.35E-04 | 1.9 | oxidation-reduction process | S | Extracellular | Sol |
| 2371 | gi 357476371 | class III peroxidase ( <i>Medicago truncatula</i> )                     | 1.20E-02 | 1.5 | oxidation-reduction process | S | Extracellular | Sol |
| 3519 | gi 357476371 | class III peroxidase ( <i>Medicago truncatula</i> )                     | 7.62E-06 | 2   | oxidation-reduction process | S | Extracellular | Sol |
| 3663 | gi 357476371 | class III peroxidase ( <i>Medicago truncatula</i> )                     | 1.20E-04 | 1.9 | oxidation-reduction process | S | Extracellular | Sol |
| 2342 | gi 971564    | peroxidase2 ( <i>Medicago sativa</i> )                                  | 2.00E-03 | 1.8 | oxidation-reduction process | S | Extracellular | Sol |
| 2356 | gi 13992528  | peroxidase2 ( <i>Medicago sativa</i> )                                  | 1.27E-04 | 2.1 | oxidation-reduction process | S | Extracellular | Sol |
| 2372 | gi 13992528  | peroxidase2 ( <i>Medicago sativa</i> )                                  | 7.41E-04 | 1.8 | oxidation-reduction process | S | Extracellular | Sol |
| 3535 | gi 971564    | peroxidase2 ( <i>Medicago sativa</i> )                                  | 2.61E-04 | 1.9 | oxidation-reduction process | S | Extracellular | Sol |
| 3536 | gi 13992528  | peroxidase2 ( <i>Medicago sativa</i> )                                  | 2.49E-04 | 1.8 | oxidation-reduction process | S | Extracellular | Sol |
| 3617 | gi 13992528  | peroxidase2 ( <i>Medicago sativa</i> )                                  | 7.00E-03 | 2   | oxidation-reduction process | S | Extracellular | Sol |
| 3636 | gi 13992528  | peroxidase2 ( <i>Medicago sativa</i> )                                  | 1.11E-05 | 2   | oxidation-reduction process | S | Extracellular | Sol |
| 3637 | gi 13992528  | peroxidase2 ( <i>Medicago sativa</i> )                                  | 2.30E-02 | 1.7 | oxidation-reduction process | S | Extracellular | Sol |
| 3664 | gi 13992528  | peroxidase2 ( <i>Medicago sativa</i> )                                  | 9.39E-06 | 2.1 | oxidation-reduction process | S | Extracellular | Sol |
| 3158 | gi 922335020 | plastocyanin-like domain protein ( <i>Medicago truncatula</i> )         | 3.80E-02 | 1.4 | oxidation-reduction process | S | Cell Memb     | Mem |
| 3075 | gi 357480841 | photosystem I reaction center subunit II ( <i>Medicago truncatula</i> ) | 2.00E-03 | 2.4 | photosynthesis              | C | Plastid       | Sol |

|      |              |                                                                            |          |     |             |   |                  |     |
|------|--------------|----------------------------------------------------------------------------|----------|-----|-------------|---|------------------|-----|
| 1922 | gi 922327497 | eukaryotic aspartyl protease family protein ( <i>Medicago truncatula</i> ) | 1.00E-03 | 2.8 | proteolysis | C | Extracellular    | Sol |
| 1938 | gi 922327497 | eukaryotic aspartyl protease family protein ( <i>Medicago truncatula</i> ) | 3.00E-03 | 3.3 | proteolysis | C | Extracellular    | Sol |
| 3541 | gi 922327497 | eukaryotic aspartyl protease family protein ( <i>Medicago truncatula</i> ) | 1.40E-02 | 2.1 | proteolysis | C | Extracellular    | Sol |
| 3595 | gi 922327497 | eukaryotic aspartyl protease family protein ( <i>Medicago truncatula</i> ) | 1.00E-02 | 1.9 | proteolysis | C | Extracellular    | Sol |
| 2699 | gi 922336331 | carboxyl-terminal peptidase ( <i>Medicago truncatula</i> )                 | 9.00E-03 | 1.6 | proteolysis | S | Extracellular    | Sol |
| 2374 | gi 357437715 | papain family cysteine protease ( <i>Medicago truncatula</i> )             | 1.90E-02 | 1.4 | proteolysis | S | Lysosome/Vacuole | Sol |

| # spot                                                  | Identification | Assigned protein                                                                         | p-value  | FC  | Functional class               | TargetP | Localisation <sup>a</sup> | Type <sup>a,b</sup> |
|---------------------------------------------------------|----------------|------------------------------------------------------------------------------------------|----------|-----|--------------------------------|---------|---------------------------|---------------------|
| <b>EGTA fraction</b>                                    |                |                                                                                          |          |     |                                |         |                           |                     |
|                                                         |                |                                                                                          |          |     |                                |         |                           |                     |
| <b>Proteins of lower abundance in Cd-exposed plants</b> |                |                                                                                          |          |     |                                |         |                           |                     |
| 1003                                                    | gi 357461143   | sedoheptulosE-1,7-bisphosphatase ( <i>Medicago truncatula</i> )                          | 1.90E-02 | 2.1 | carbohydrate metabolic process | C       | Plastid                   | Sol                 |
| 892                                                     | gi 374634428   | polygalacturonasE-inhibiting protein 1, partial ( <i>Medicago sativa</i> subsp. x varia) | 3.89E-04 | 1.6 | cell wall modification         | /       | Extracellular             | Sol                 |
| 989                                                     | gi 357504799   | pectinesterase/pectinesterase inhibitor ( <i>Medicago truncatula</i> )                   | 2.00E-03 | 3.2 | cell wall modification         | S       | Lysosome/Vacuole          | Sol                 |
| 1007                                                    | gi 357504799   | pectinesterase/pectinesterase inhibitor ( <i>Medicago truncatula</i> )                   | 2.00E-03 | 3.5 | cell wall modification         | S       | Lysosome/Vacuole          | Sol                 |
| 2096                                                    | gi 74058377    | cystatin ( <i>Medicago sativa</i> )                                                      | 1.00E-03 | 1.9 | defence                        | /       | Cytoplasm                 | Sol                 |
| 1439                                                    | gi 922367846   | pathogenesis-related thaumatin family protein ( <i>Medicago truncatula</i> )             | 3.00E-03 | 1.9 | defence                        | S       | Extracellular             | Sol                 |
| 759                                                     | gi 357508587   | Nod factor-binding lectin-nucleotide phosphohydrolase ( <i>Medicago truncatula</i> )     | 4.70E-02 | 1.8 | Defence                        | S       | Extracellular             | Sol                 |
| 762                                                     | gi 922345135   | Nod factor-binding lectin-nucleotide phosphohydrolase ( <i>Medicago truncatula</i> )     | 2.40E-02 | 1.7 | Defence                        | S       | Extracellular             | Sol                 |

|      |              |                                                                                      |          |     |                             |   |               |      |
|------|--------------|--------------------------------------------------------------------------------------|----------|-----|-----------------------------|---|---------------|------|
| 835  | gi 922339971 | Nod factor-binding lectin-nucleotide phosphohydrolase ( <i>Medicago truncatula</i> ) | 4.00E-02 | 1.5 | Defence                     | S | Extracellular | Sol  |
| 2293 | gi 922345135 | Nod factor-binding lectin-nucleotide phosphohydrolase ( <i>Medicago truncatula</i> ) | 5.00E-03 | 1.9 | Defence                     | S | Extracellular | Sol  |
| 1454 | gi 357513969 | auxin-binding protein ABP19a ( <i>Medicago truncatula</i> )                          | 2.00E-03 | 2   | nutrient reserve            | S | Extracellular | Sol  |
| 1455 | gi 357513969 | auxin-binding protein ABP19a ( <i>Medicago truncatula</i> )                          | 1.00E-03 | 2.5 | nutrient reserve            | S | Extracellular | Sol  |
| 1456 | gi 357513969 | auxin-binding protein ABP19a ( <i>Medicago truncatula</i> )                          | 4.00E-03 | 2.3 | nutrient reserve            | S | Extracellular | Sol  |
| 2254 | gi 922390231 | auxin-binding protein ABP19a ( <i>Medicago truncatula</i> )                          | 3.00E-03 | 1.4 | nutrient reserve            | S | Extracellular | Sol  |
| 1464 | gi 502156424 | germin-like protein subfamily 3 member 1 ( <i>Cicer arietinum</i> )                  | 8.36E-05 | 2.8 | nutrient reserve            | S | Extracellular | Sol  |
| 1383 | gi 357513539 | stem 28 kDa glycoprotein ( <i>Medicago truncatula</i> )                              | 1.60E-02 | 2.1 | nutrient reserve            | S | Extracellular | Sol  |
| 1386 | gi 357513539 | stem 28 kDa glycoprotein ( <i>Medicago truncatula</i> )                              | 2.30E-02 | 1.8 | nutrient reserve            | S | Extracellular | Sol  |
| 1726 | gi 357513539 | stem 28 kDa glycoprotein ( <i>Medicago truncatula</i> )                              | 5.00E-03 | 2   | nutrient reserve            | S | Extracellular | Sol  |
| 1641 | gi 922395795 | 1-cys peroxiredoxin PER1 ( <i>Medicago truncatula</i> )                              | 2.00E-03 | 2.3 | oxidation-reduction process | C | Plastid       | Sol  |
| 1496 | gi 3293555   | Chlorophyll a-b binding protein 2, ( <i>Populus euphratica</i> )                     | 8.00E-03 | 1.7 | photosynthesis              | C | Plastid       | Memb |
| 2048 | gi 922331371 | oxygen-evolving enhancer protein ( <i>Medicago truncatula</i> )                      | 1.00E-03 | 2.4 | photosynthesis              | C | Plastid       | Memb |
| 1610 | gi 502127023 | oxygen-evolving enhancer protein 2, ( <i>Cicer arietinum</i> )                       | 3.50E-02 | 3.7 | photosynthesis              | C | Plastid       | Memb |
| 1603 | gi 922378761 | oxygen-evolving enhancer protein 2-1 ( <i>Medicago truncatula</i> )                  | 2.60E-02 | 5.9 | photosynthesis              | C | Plastid       | Memb |
| 1522 | gi 357512271 | ribosE-5-phosphate isomerase A ( <i>Medicago truncatula</i> )                        | 1.00E-03 | 2.5 | photosynthesis              | C | Plastid       | Sol  |
| 1530 | gi 357512271 | ribosE-5-phosphate isomerase A ( <i>Medicago truncatula</i> )                        | 2.31E-05 | 3.1 | photosynthesis              | C | Plastid       | Sol  |
| 1532 | gi 357512271 | ribosE-5-phosphate isomerase A ( <i>Medicago truncatula</i> )                        | 5.27E-04 | 4   | photosynthesis              | C | Plastid       | Sol  |

|                                                          |              |                                                                                 |          |     |                                 |   |               |      |
|----------------------------------------------------------|--------------|---------------------------------------------------------------------------------|----------|-----|---------------------------------|---|---------------|------|
| 1534                                                     | gi 357512271 | ribosE-5-phosphate isomerase A ( <i>Medicago truncatula</i> )                   | 1.46E-04 | 5.3 | photosynthesis                  | C | Plastid       | Sol  |
| 2267                                                     | gi 922402507 | photosystem I reaction center subunit IV A ( <i>Medicago truncatula</i> )       | 2.10E-02 | 2.9 | photosynthesis                  | C | Plastid       | Memb |
| 956                                                      | gi 922379288 | eukaryotic aspartyl protease family protein ( <i>Medicago truncatula</i> )      | 1.30E-02 | 1.5 | proteolysis                     | S | Extracellular | Sol  |
| 961                                                      | gi 922379284 | eukaryotic aspartyl protease family protein ( <i>Medicago truncatula</i> )      | 2.00E-03 | 1.9 | proteolysis                     | S | Extracellular | Sol  |
| 962                                                      | gi 922379288 | eukaryotic aspartyl protease family protein ( <i>Medicago truncatula</i> )      | 5.00E-03 | 1.8 | proteolysis                     | S | Extracellular | Sol  |
| 964                                                      | gi 922379288 | eukaryotic aspartyl protease family protein ( <i>Medicago truncatula</i> )      | 7.63E-04 | 2   | proteolysis                     | S | Extracellular | Sol  |
| 978                                                      | gi 357448247 | eukaryotic aspartyl protease family protein ( <i>Medicago truncatula</i> )      | 4.00E-03 | 1.5 | proteolysis                     | S | Extracellular | Sol  |
| 983                                                      | gi 357448247 | eukaryotic aspartyl protease family protein ( <i>Medicago truncatula</i> )      | 7.00E-03 | 1.7 | proteolysis                     | S | Extracellular | Sol  |
| 1258                                                     | gi 922388614 | lactoylglutathione lyase-like protein ( <i>Medicago truncatula</i> )            | 6.00E-03 | 2.3 | secondary metabolite metabolism | / | Cytoplasm     | Sol  |
| 2242                                                     | gi 922395263 | plant/F18G18-200 protein ( <i>Medicago truncatula</i> )                         | 2.00E-03 | 2   | unknown function                | S | Extracellular | Sol  |
| 2295                                                     | gi 922395263 | plant/F18G18-200 protein ( <i>Medicago truncatula</i> )                         | 1.00E-03 | 2.3 | unknown function                | S | Extracellular | Sol  |
| 2296                                                     | gi 922395263 | plant/F18G18-200 protein ( <i>Medicago truncatula</i> )                         | 1.00E-03 | 2.5 | unknown function                | S | Extracellular | Sol  |
| <b>Proteins of higher abundance in Cd-exposed plants</b> |              |                                                                                 |          |     |                                 |   |               |      |
| 1996                                                     | gi 7381205   | prE-hevein-like protein ( <i>Pisum sativum</i> )                                | 5.26E-05 | 2.3 | defence                         | / | Extracellular | Sol  |
| 2216                                                     | gi 695063425 | polyubiquitin ( <i>Musa acuminata</i> subsp. <i>malaccensis</i> )               | 1.80E-02 | 1.5 | proteolysis                     | / | Cytoplasm     | Sol  |
| 2134                                                     | gi 33327284  | polyubiquitin 1 ( <i>Phaseolus vulgaris</i> )                                   | 3.30E-02 | 1.5 | proteolysis                     | / | Nucleus       | Sol  |
| 1900                                                     | gi 695062350 | polyubiquitin-like, partial ( <i>Musa acuminata</i> subsp. <i>malaccensis</i> ) | 1.10E-02 | 1.6 | proteolysis                     | / | Nucleus       | Sol  |
| 904                                                      | gi 922327497 | eukaryotic aspartyl protease family protein ( <i>Medicago truncatula</i> )      | 7.00E-03 | 2.2 | proteolysis                     | C | Extracellular | Sol  |
| 911                                                      | gi 922327497 | eukaryotic aspartyl protease family protein ( <i>Medicago truncatula</i> )      | 1.50E-02 | 2.2 | proteolysis                     | C | Extracellular | Sol  |

|      |              |                                                                            |          |     |                                |   |                  |     |
|------|--------------|----------------------------------------------------------------------------|----------|-----|--------------------------------|---|------------------|-----|
| 917  | gi 922327497 | eukaryotic aspartyl protease family protein ( <i>Medicago truncatula</i> ) | 2.90E-02 | 2.1 | proteolysis                    | C | Extracellular    | Sol |
| 948  | gi 922327497 | eukaryotic aspartyl protease family protein ( <i>Medicago truncatula</i> ) | 1.80E-02 | 1.5 | proteolysis                    | C | Extracellular    | Sol |
| 955  | gi 922327497 | eukaryotic aspartyl protease family protein ( <i>Medicago truncatula</i> ) | 5.00E-03 | 2.5 | proteolysis                    | C | Extracellular    | Sol |
| 2239 | gi 922327497 | eukaryotic aspartyl protease family protein ( <i>Medicago truncatula</i> ) | 2.40E-02 | 2.2 | proteolysis                    | C | Extracellular    | Sol |
| 2240 | gi 922327497 | eukaryotic aspartyl protease family protein ( <i>Medicago truncatula</i> ) | 1.60E-02 | 2.2 | proteolysis                    | C | Extracellular    | Sol |
| 1174 | gi 357474061 | glucan endo-1,3-beta-glucosidase ( <i>Medicago truncatula</i> )            | 2.00E-03 | 2.5 | carbohydrate metabolic process | S | Extracellular    | Sol |
| 1177 | gi 922389309 | glucan endo-1,3-beta-glucosidase ( <i>Medicago truncatula</i> )            | 1.00E-03 | 2.1 | carbohydrate metabolic process | / | Cytoplasm        | Sol |
| 1184 | gi 922389309 | glucan endo-1,3-beta-glucosidase ( <i>Medicago truncatula</i> )            | 3.00E-03 | 2   | carbohydrate metabolic process | / | Cytoplasm        | Sol |
| 1214 | gi 357474069 | glucan endo-1,3-beta-glucosidase ( <i>Medicago truncatula</i> )            | 3.10E-02 | 1.9 | carbohydrate metabolic process | S | Extracellular    | Sol |
| 1223 | gi 357474069 | glucan endo-1,3-beta-glucosidase ( <i>Medicago truncatula</i> )            | 4.00E-03 | 2   | carbohydrate metabolic process | S | Extracellular    | Sol |
| 2237 | gi 922389309 | glucan endo-1,3-beta-glucosidase ( <i>Medicago truncatula</i> )            | 1.00E-03 | 2.4 | carbohydrate metabolic process | / | Cytoplasm        | Sol |
| 2238 | gi 357474069 | glucan endo-1,3-beta-glucosidase ( <i>Medicago truncatula</i> )            | 1.00E-03 | 2.4 | carbohydrate metabolic process | S | Extracellular    | Sol |
| 1165 | gi 922401927 | allergen Pru protein, putative ( <i>Medicago truncatula</i> )              | 1.00E-03 | 3.6 | defence                        | S | Extracellular    | Sol |
| 1229 | gi 922401937 | allergen Pru protein, putative ( <i>Medicago truncatula</i> )              | 5.91E-04 | 3.9 | defence                        | S | Extracellular    | Sol |
| 1283 | gi 922401937 | allergen Pru protein, putative ( <i>Medicago truncatula</i> )              | 2.00E-03 | 3   | defence                        | S | Extracellular    | Sol |
| 1125 | gi 922329699 | Chitinase (Class Ib) / Hevein ( <i>Medicago truncatula</i> )               | 8.12E-04 | 2.3 | Defence                        | S | Lysosome/Vacuole | Sol |
| 2263 | gi 922329699 | Chitinase (Class Ib) / Hevein ( <i>Medicago truncatula</i> )               | 2.30E-02 | 1.8 | Defence                        | S | Lysosome/Vacuole | Sol |
| 2264 | gi 922329699 | Chitinase (Class Ib) / Hevein ( <i>Medicago truncatula</i> )               | 8.00E-03 | 1.8 | Defence                        | S | Lysosome/Vacuole | Sol |



|      |              |                                                                                   |          |     |                  |   |                  |     |
|------|--------------|-----------------------------------------------------------------------------------|----------|-----|------------------|---|------------------|-----|
| 2294 | gi 922329699 | Chitinase (Class Ib) / Hevein ( <i>Medicago truncatula</i> )                      | 9.00E-03 | 1.7 | Defence          | S | Lysosome/Vacuole | Sol |
| 1676 | gi 922347233 | Chitinase / Hevein / PR-4 / Wheatwin2 ( <i>Medicago truncatula</i> )              | 3.50E-02 | 1.5 | Defence          | S | Extracellular    | Sol |
| 2000 | gi 922403681 | Chitinase / Hevein / PR-4 / Wheatwin2 ( <i>Medicago truncatula</i> )              | 2.34E-04 | 3.3 | Defence          | S | Extracellular    | Sol |
| 2224 | gi 922403683 | Chitinase / Hevein / PR-4 / Wheatwin2 ( <i>Medicago truncatula</i> )              | 1.00E-03 | 2.3 | Defence          | S | Extracellular    | Sol |
| 1399 | gi 357443753 | chitinase ( <i>Medicago truncatula</i> )                                          | 4.25E-04 | 3   | Defence          | S | Extracellular    | Sol |
| 1416 | gi 357443753 | chitinase ( <i>Medicago truncatula</i> )                                          | 2.00E-03 | 3.1 | Defence          | S | Extracellular    | Sol |
| 1419 | gi 357443753 | chitinase ( <i>Medicago truncatula</i> )                                          | 3.20E-04 | 3.6 | Defence          | S | Extracellular    | Sol |
| 1360 | gi 228204925 | chitinase class III-1 ( <i>Medicago sativa</i> )                                  | 7.63E-04 | 1.9 | Defence          | S | Extracellular    | Sol |
| 1372 | gi 228204925 | chitinase class III-1 ( <i>Medicago sativa</i> )                                  | 2.00E-03 | 2.4 | Defence          | S | Extracellular    | Sol |
| 2253 | gi 228204925 | chitinase class III-1 ( <i>Medicago sativa</i> )                                  | 6.27E-04 | 2   | Defence          | S | Extracellular    | Sol |
| 1225 | gi 1800141   | class I chitinase ( <i>Medicago sativa</i> )                                      | 3.00E-03 | 1.9 | Defence          | S | Lysosome/Vacuole | Sol |
| 1279 | gi 1800141   | class I chitinase ( <i>Medicago sativa</i> )                                      | 1.00E-03 | 2.2 | Defence          | S | Lysosome/Vacuole | Sol |
| 2249 | gi 1800141   | class I chitinase ( <i>Medicago sativa</i> )                                      | 6.00E-03 | 1.8 | Defence          | S | Lysosome/Vacuole | Sol |
| 2259 | gi 1800141   | class I chitinase ( <i>Medicago sativa</i> )                                      | 3.00E-03 | 1.9 | Defence          | S | Lysosome/Vacuole | Sol |
| 2266 | gi 1800141   | class I chitinase ( <i>Medicago sativa</i> )                                      | 1.10E-02 | 1.8 | Defence          | S | Lysosome/Vacuole | Sol |
| 912  | gi 922325015 | disease resistance response protein ( <i>Medicago truncatula</i> )                | 4.09E-04 | 2   | defence          | S | Lysosome/Vacuole | Sol |
| 1531 | gi 922338021 | pathogenesis-related thaumatin family protein ( <i>Medicago truncatula</i> )      | 7.61E-04 | 1.7 | defence          | S | Extracellular    | Sol |
| 1540 | gi 922338021 | pathogenesis-related thaumatin family protein ( <i>Medicago truncatula</i> )      | 2.00E-03 | 2.4 | defence          | S | Extracellular    | Sol |
| 2246 | gi 922338023 | pathogenesis-related thaumatin family protein ( <i>Medicago truncatula</i> )      | 2.00E-03 | 4.9 | defence          | S | Extracellular    | Sol |
| 1549 | gi 922407517 | plant basic secretory protein (BSP) family protein ( <i>Medicago truncatula</i> ) | 4.00E-03 | 1.8 | defence          | S | Extracellular    | Sol |
| 1550 | gi 922407517 | plant basic secretory protein (BSP) family protein ( <i>Medicago truncatula</i> ) | 4.00E-03 | 2   | defence          | S | Extracellular    | Sol |
| 1332 | gi 357511665 | rhicadhesin receptor ( <i>Medicago truncatula</i> )                               | 2.00E-03 | 2.3 | nutrient reserve | S | Extracellular    | Sol |

|      |              |                                                                    |          |     |                                |   |                  |      |
|------|--------------|--------------------------------------------------------------------|----------|-----|--------------------------------|---|------------------|------|
| 926  | gi 922380311 | anionic peroxidase swpb3 protein<br>( <i>Medicago truncatula</i> ) | 2.90E-02 | 1.8 | oxidation-reduction<br>process | S | Extracellular    | Sol  |
| 1109 | gi 357491415 | class III peroxidase ( <i>Medicago truncatula</i> )                | 1.20E-02 | 1.6 | oxidation-reduction<br>process | S | Extracellular    | Sol  |
| 1186 | gi 357491415 | class III peroxidase ( <i>Medicago truncatula</i> )                | 2.50E-02 | 1.8 | oxidation-reduction<br>process | S | Extracellular    | Sol  |
| 2256 | gi 357491415 | class III peroxidase ( <i>Medicago truncatula</i> )                | 1.20E-02 | 1.8 | oxidation-reduction<br>process | S | Extracellular    | Sol  |
| 1150 | gi 13992528  | peroxidase2 ( <i>Medicago sativa</i> )                             | 1.10E-02 | 2   | oxidation-reduction<br>process | S | Extracellular    | Sol  |
| 2232 | gi 922335020 | plastocyanin-like domain protein<br>( <i>Medicago truncatula</i> ) | 3.60E-02 | 1.4 | oxidation-reduction<br>process | S | Cell Memb        | Memb |
| 1445 | gi 922336321 | carboxyl-terminal peptidase ( <i>Medicago<br/>truncatula</i> )     | 4.00E-03 | 1.7 | proteolysis                    | S | Cell Memb        | Memb |
| 1971 | gi 357437719 | papain family cysteine protease<br>( <i>Medicago truncatula</i> )  | 7.00E-03 | 1.9 | proteolysis                    | S | Lysosome/Vacuole | Sol  |
| 2273 | gi 922333118 | subtilisin-like serine protease ( <i>Medicago<br/>truncatula</i> ) | 3.20E-02 | 1.4 | proteolysis                    | S | Extracellular    | Sol  |

| #<br>spot                                                      | Identification | Assigned protein                                                          | p-value  | FC  | Functional class          | TargetP | Localisation <sup>a</sup> | Type <sup>a,b</sup> |
|----------------------------------------------------------------|----------------|---------------------------------------------------------------------------|----------|-----|---------------------------|---------|---------------------------|---------------------|
| <b><u>LiCl fraction</u></b>                                    |                |                                                                           |          |     |                           |         |                           |                     |
| <b><i>Proteins of lower abundance in Cd-exposed plants</i></b> |                |                                                                           |          |     |                           |         |                           |                     |
| 717                                                            | gi 922335979   | polygalacturonase non-catalytic protein<br>( <i>Medicago truncatula</i> ) | 2.60E-02 | 1.5 | cell wall<br>modification | S       | Extracellular             | Sol                 |
| 718                                                            | gi 922335979   | polygalacturonase non-catalytic protein<br>( <i>Medicago truncatula</i> ) | 1.80E-02 | 1.6 | cell wall<br>modification | S       | Extracellular             | Sol                 |
| 788                                                            | gi 922335981   | polygalacturonase non-catalytic protein<br>( <i>Medicago truncatula</i> ) | 2.10E-02 | 1.8 | cell wall<br>modification | S       | Extracellular             | Sol                 |
| 794                                                            | gi 922335979   | polygalacturonase non-catalytic protein<br>( <i>Medicago truncatula</i> ) | 2.20E-02 | 1.6 | cell wall<br>modification | S       | Extracellular             | Sol                 |
| 819                                                            | gi 922335979   | polygalacturonase non-catalytic protein<br>( <i>Medicago truncatula</i> ) | 8.00E-03 | 1.6 | cell wall<br>modification | S       | Extracellular             | Sol                 |
| 827                                                            | gi 922335979   | polygalacturonase non-catalytic protein<br>( <i>Medicago truncatula</i> ) | 5.00E-03 | 1.9 | cell wall<br>modification | S       | Extracellular             | Sol                 |

|                                                          |              |                                                                                 |          |     |                        |   |               |     |
|----------------------------------------------------------|--------------|---------------------------------------------------------------------------------|----------|-----|------------------------|---|---------------|-----|
| 832                                                      | gi 922335979 | polygalacturonase non-catalytic protein ( <i>Medicago truncatula</i> )          | 6.00E-03 | 2.1 | cell wall modification | S | Extracellular | Sol |
| 870                                                      | gi 922335981 | polygalacturonase non-catalytic protein ( <i>Medicago truncatula</i> )          | 4.25E-05 | 4.3 | cell wall modification | S | Extracellular | Sol |
| 878                                                      | gi 922335981 | polygalacturonase non-catalytic protein ( <i>Medicago truncatula</i> )          | 2.50E-06 | 4.7 | cell wall modification | S | Extracellular | Sol |
| 181                                                      | gi 357513969 | auxin-binding protein ABP19a ( <i>Medicago truncatula</i> )                     | 1.70E-02 | 1.3 | nutrient reserve       | S | Extracellular | Sol |
| 1338                                                     | gi 357513539 | stem 28 kDa glycoprotein ( <i>Medicago truncatula</i> )                         | 4.30E-02 | 1.5 | nutrient reserve       | S | Extracellular | Sol |
| 1342                                                     | gi 357513539 | stem 28 kDa glycoprotein ( <i>Medicago truncatula</i> )                         | 1.60E-02 | 1.7 | nutrient reserve       | S | Extracellular | Sol |
| 1350                                                     | gi 357513539 | stem 28 kDa glycoprotein ( <i>Medicago truncatula</i> )                         | 4.00E-03 | 1.7 | nutrient reserve       | S | Extracellular | Sol |
| 1355                                                     | gi 357513539 | stem 28 kDa glycoprotein ( <i>Medicago truncatula</i> )                         | 1.40E-02 | 1.7 | nutrient reserve       | S | Extracellular | Sol |
| 1359                                                     | gi 357513539 | stem 28 kDa glycoprotein ( <i>Medicago truncatula</i> )                         | 2.19E-04 | 1.5 | nutrient reserve       | S | Extracellular | Sol |
| 1361                                                     | gi 357513539 | stem 28 kDa glycoprotein ( <i>Medicago truncatula</i> )                         | 7.00E-03 | 2.1 | nutrient reserve       | S | Extracellular | Sol |
| 1369                                                     | gi 357513539 | stem 28 kDa glycoprotein ( <i>Medicago truncatula</i> )                         | 3.00E-03 | 2.3 | nutrient reserve       | S | Extracellular | Sol |
| 1628                                                     | gi 357513539 | stem 28 kDa glycoprotein ( <i>Medicago truncatula</i> )                         | 1.10E-02 | 1.4 | nutrient reserve       | S | Extracellular | Sol |
| 2254                                                     | gi 357513539 | stem 28 kDa glycoprotein ( <i>Medicago truncatula</i> )                         | 7.00E-03 | 2.1 | nutrient reserve       | S | Extracellular | Sol |
| <b>Proteins of higher abundance in Cd-exposed plants</b> |              |                                                                                 |          |     |                        |   |               |     |
| 2012                                                     | gi 922395829 | pentameric polyubiquitin ( <i>Medicago truncatula</i> )                         | 3.90E-02 | 1.9 | proteolysis            | / | Cytoplasm     | Sol |
| 2026                                                     | gi 732558989 | polyubiquitin 11, partial ( <i>Pinus massoniana</i> )                           | 3.00E-02 | 1.9 | proteolysis            | / | Nucleus       | Sol |
| 2057                                                     | gi 695062350 | polyubiquitin-like, partial ( <i>Musa acuminata</i> subsp. <i>malaccensis</i> ) | 7.00E-03 | 1.9 | proteolysis            | / | Nucleus       | Sol |
| 928                                                      | gi 922327497 | eukaryotic aspartyl protease family protein ( <i>Medicago truncatula</i> )      | 8.00E-03 | 2   | proteolysis            | C | Extracellular | Sol |
| 933                                                      | gi 922327497 | eukaryotic aspartyl protease family protein ( <i>Medicago truncatula</i> )      | 2.00E-03 | 2   | proteolysis            | C | Extracellular | Sol |

|      |              |                                                                              |          |     |                                |   |                  |     |
|------|--------------|------------------------------------------------------------------------------|----------|-----|--------------------------------|---|------------------|-----|
| 952  | gi 922327497 | eukaryotic aspartyl protease family protein ( <i>Medicago truncatula</i> )   | 1.70E-02 | 2.4 | proteolysis                    | C | Extracellular    | Sol |
| 1194 | gi 357474069 | glucan endo-1,3-beta-glucosidase ( <i>Medicago truncatula</i> )              | 1.20E-02 | 2.6 | carbohydrate metabolic process | S | Extracellular    | Sol |
| 1195 | XP_003607319 | glucan endo-1,3-beta-glucosidase ( <i>Medicago truncatula</i> )              | 2.00E-03 | 2.5 | carbohydrate metabolic process | S | Extracellular    | Sol |
| 1201 | gi 357474069 | glucan endo-1,3-beta-glucosidase ( <i>Medicago truncatula</i> )              | 1.00E-03 | 3.4 | carbohydrate metabolic process | S | Extracellular    | Sol |
| 1292 | gi 357454031 | glycoside hydrolase family 18 protein ( <i>Medicago truncatula</i> )         | 3.00E-03 | 2.8 | carbohydrate metabolic process | S | Lysosome/Vacuole | Sol |
| 1097 | gi 922401927 | allergen Pru protein, putative ( <i>Medicago truncatula</i> )                | 7.09E-06 | 4.5 | defence                        | S | Extracellular    | Sol |
| 1166 | gi 922401937 | allergen Pru protein, putative ( <i>Medicago truncatula</i> )                | 8.18E-06 | 4.8 | defence                        | S | Extracellular    | Sol |
| 1236 | gi 922401927 | allergen Pru protein, putative ( <i>Medicago truncatula</i> )                | 1.00E-03 | 4   | defence                        | S | Extracellular    | Sol |
| 1088 | gi 922329699 | Chitinase (Class Ib) / Hevein ( <i>Medicago truncatula</i> )                 | 1.90E-02 | 2.2 | Defence                        | S | Lysosome/Vacuole | Sol |
| 1112 | gi 922329699 | Chitinase (Class Ib) / Hevein ( <i>Medicago truncatula</i> )                 | 7.00E-03 | 2.7 | Defence                        | S | Lysosome/Vacuole | Sol |
| 1571 | gi 922347233 | Chitinase / Hevein / PR-4 / Wheatwin2 ( <i>Medicago truncatula</i> )         | 7.00E-03 | 2.4 | Defence                        | S | Extracellular    | Sol |
| 1807 | gi 922403683 | Chitinase / Hevein / PR-4 / Wheatwin2 ( <i>Medicago truncatula</i> )         | 8.00E-03 | 1.6 | Defence                        | S | Extracellular    | Sol |
| 1844 | gi 922403681 | Chitinase / Hevein / PR-4 / Wheatwin2 ( <i>Medicago truncatula</i> )         | 2.20E-02 | 2   | Defence                        | S | Extracellular    | Sol |
| 2242 | gi 922403685 | Chitinase / Hevein / PR-4 / Wheatwin2 ( <i>Medicago truncatula</i> )         | 5.10E-05 | 3   | Defence                        | S | Extracellular    | Sol |
| 2252 | gi 922403685 | Chitinase / Hevein / PR-4 / Wheatwin2 ( <i>Medicago truncatula</i> )         | 2.02E-04 | 3.3 | Defence                        | S | Extracellular    | Sol |
| 1666 | gi 922338023 | pathogenesis-related thaumatin family protein ( <i>Medicago truncatula</i> ) | 4.00E-03 | 5   | defence                        | S | Extracellular    | Sol |
| 1516 | gi 922390231 | auxin-binding protein ABP19a ( <i>Medicago truncatula</i> )                  | 3.00E-02 | 1.5 | nutrient reserve               | S | Extracellular    | Sol |
| 1306 | gi 357511665 | rhicadhesin receptor ( <i>Medicago truncatula</i> )                          | 8.53E-04 | 2.2 | nutrient reserve               | S | Extracellular    | Sol |

|      |              |                                                                |          |     |                             |   |                  |     |
|------|--------------|----------------------------------------------------------------|----------|-----|-----------------------------|---|------------------|-----|
| 843  | gi 537317    | peroxidase ( <i>Medicago sativa</i> )                          | 4.10E-02 | 1.5 | oxidation-reduction process | S | Extracellular    | Sol |
| 848  | gi 537317    | peroxidase ( <i>Medicago sativa</i> )                          | 9.25E-04 | 1.8 | oxidation-reduction process | S | Extracellular    | Sol |
| 849  | gi 537317    | peroxidase ( <i>Medicago sativa</i> )                          | 1.94E-04 | 2.6 | oxidation-reduction process | S | Extracellular    | Sol |
| 854  | gi 537317    | peroxidase ( <i>Medicago sativa</i> )                          | 2.00E-03 | 2.1 | oxidation-reduction process | S | Extracellular    | Sol |
| 2240 | gi 537317    | peroxidase ( <i>Medicago sativa</i> )                          | 5.93E-04 | 1.9 | oxidation-reduction process | S | Extracellular    | Sol |
| 2241 | gi 537317    | peroxidase ( <i>Medicago sativa</i> )                          | 6.05E-04 | 1.9 | oxidation-reduction process | S | Extracellular    | Sol |
| 2244 | gi 537317    | peroxidase ( <i>Medicago sativa</i> )                          | 8.00E-03 | 3.2 | oxidation-reduction process | S | Extracellular    | Sol |
| 959  | gi 357448431 | peroxidase family protein ( <i>Medicago truncatula</i> )       | 2.80E-02 | 1.2 | oxidation-reduction process | S | Extracellular    | Sol |
| 900  | gi 971560    | peroxidase1B ( <i>Medicago sativa</i> )                        | 3.60E-02 | 1.4 | oxidation-reduction process | S | Extracellular    | Sol |
| 958  | gi 971560    | peroxidase1B ( <i>Medicago sativa</i> )                        | 2.10E-02 | 1.6 | oxidation-reduction process | S | Extracellular    | Sol |
| 2261 | gi 971560    | peroxidase1B ( <i>Medicago sativa</i> )                        | 4.00E-03 | 1.9 | oxidation-reduction process | S | Extracellular    | Sol |
| 1250 | gi 357437715 | papain family cysteine protease ( <i>Medicago truncatula</i> ) | 8.00E-03 | 1.7 | proteolysis                 | S | Lysosome/Vacuole | Sol |
