# Supplementary material for: Changes in the Proteome of Medicago sativa Leaves in Response to Long-Term Cadmium Exposure Using a Cell-Wall Targeted Approach
Source: MDPI journal article supplement (doi:10.3390/ijms19092498), 2018-08-24
Supplement: s1 [file s1]

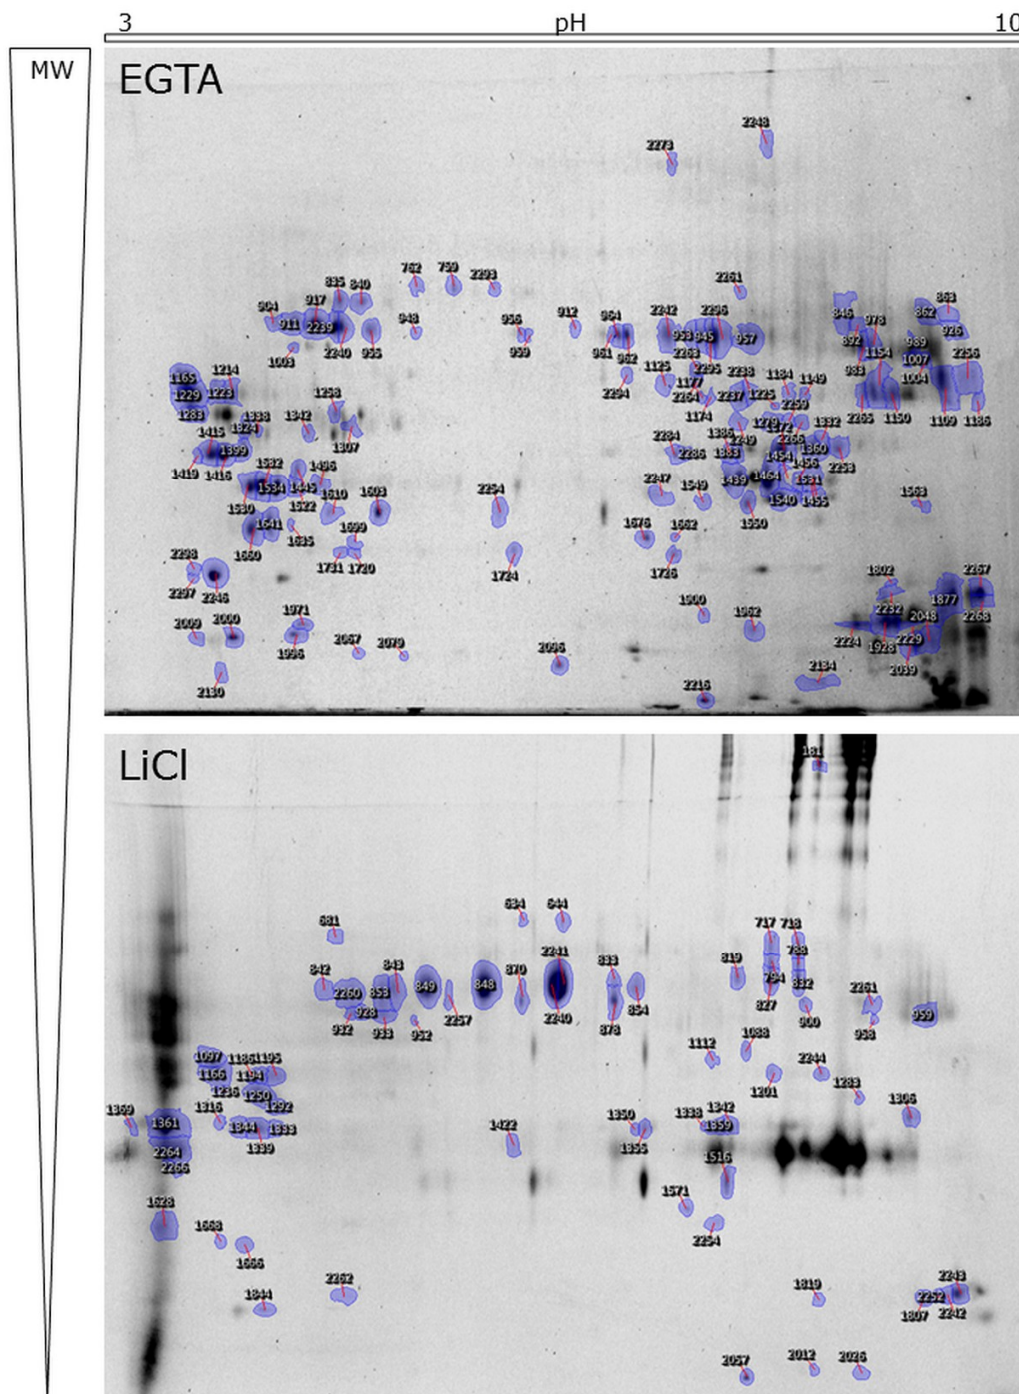

**Figure S1.** 2D DIGE from the cell wall protein-enriched EGTA and LiCl fractions of *M. sativa* leaves. Extractions were performed in four replicates. Proteins were pre-labelled with different CyDye to enable relative quantitative protein analysis. Labelled samples were loaded onto Immobiline™ DryStrip 3-10 NL, 24 cm (GE Healthcare) followed by migration on HPE™ Large Gel NF-12.5 % (Serva Electrophoresis GmbH). Indicated spots were selected for picking based on statistical parameters calculated by the SameSpots software (TotalLab). MW = molecular weight.
